# Supplementary material
Source: Springer Nature journal article supplement (https://www.springermedizin.de/resource/supplementary/12967_2011_717_MOESM4_ESM.pdf/9577382)

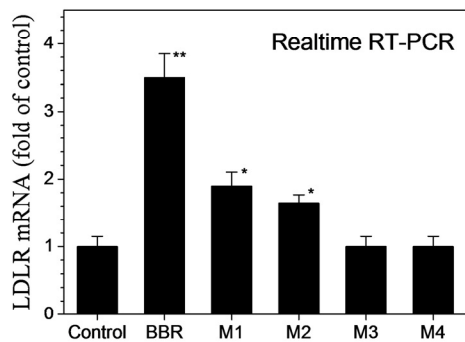

**a**

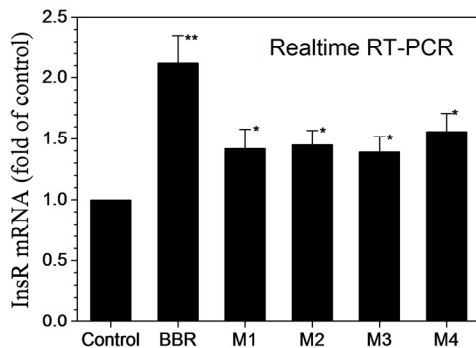

**b**

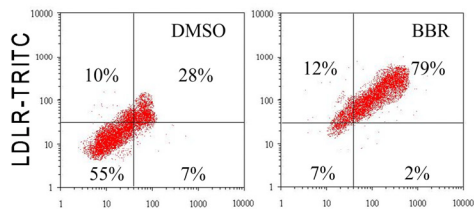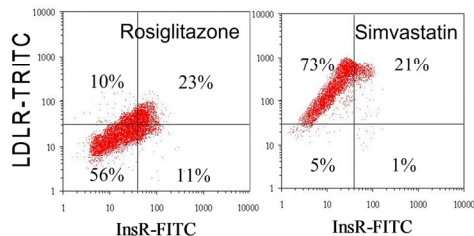

**c**

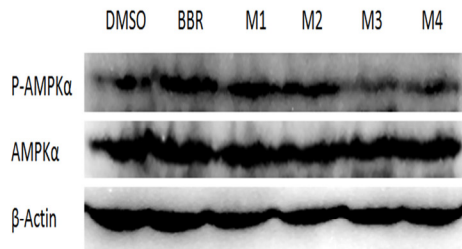

**d**

Supplement: MOESM4 [file 9577382]
